# Supplementary material
Source: PubMed Central journal article supplement (PMC6082203)
Supplement: 11606_2018_4425_MOESM1_ESM.pdf [file 11606_2018_4425_MOESM1_ESM.pdf]

**Supplementary materials for**

**“Performance of publication bias tests for meta-analyses in the Cochrane Library”**

Lifeng Lin, Haitao Chu, Mohammad Hassan Murad, Chuan Hong, Zhiyong Qu, Stephen R Cole,  
Yong Chen

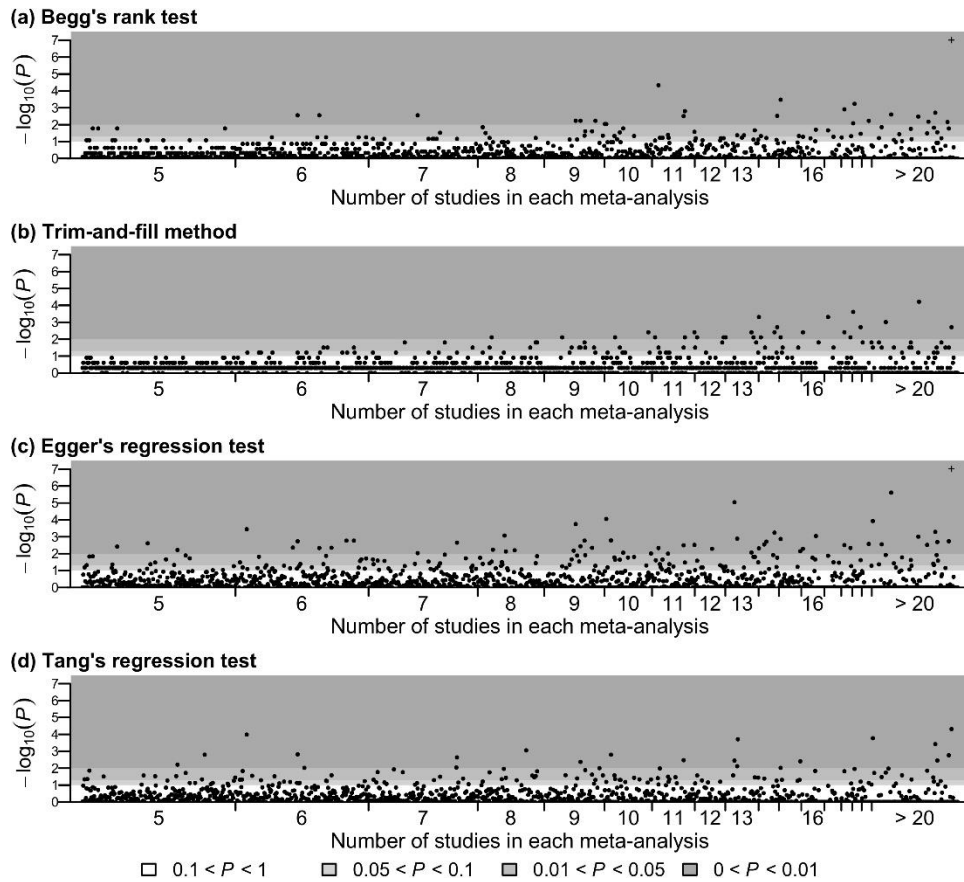

**Figure S1.** The  $P$ -values produced by four publication bias tests for the 1291 meta-analyses that are the largest in their corresponding Cochrane systematic reviews with non-binary outcomes. Plus signs (+) indicate  $P$ -values  $< 10^{-7}$ . The total sample sizes were not reported in 134 meta-analyses, so Tang's test was not applicable for them, and panel (d) does not contain their results.

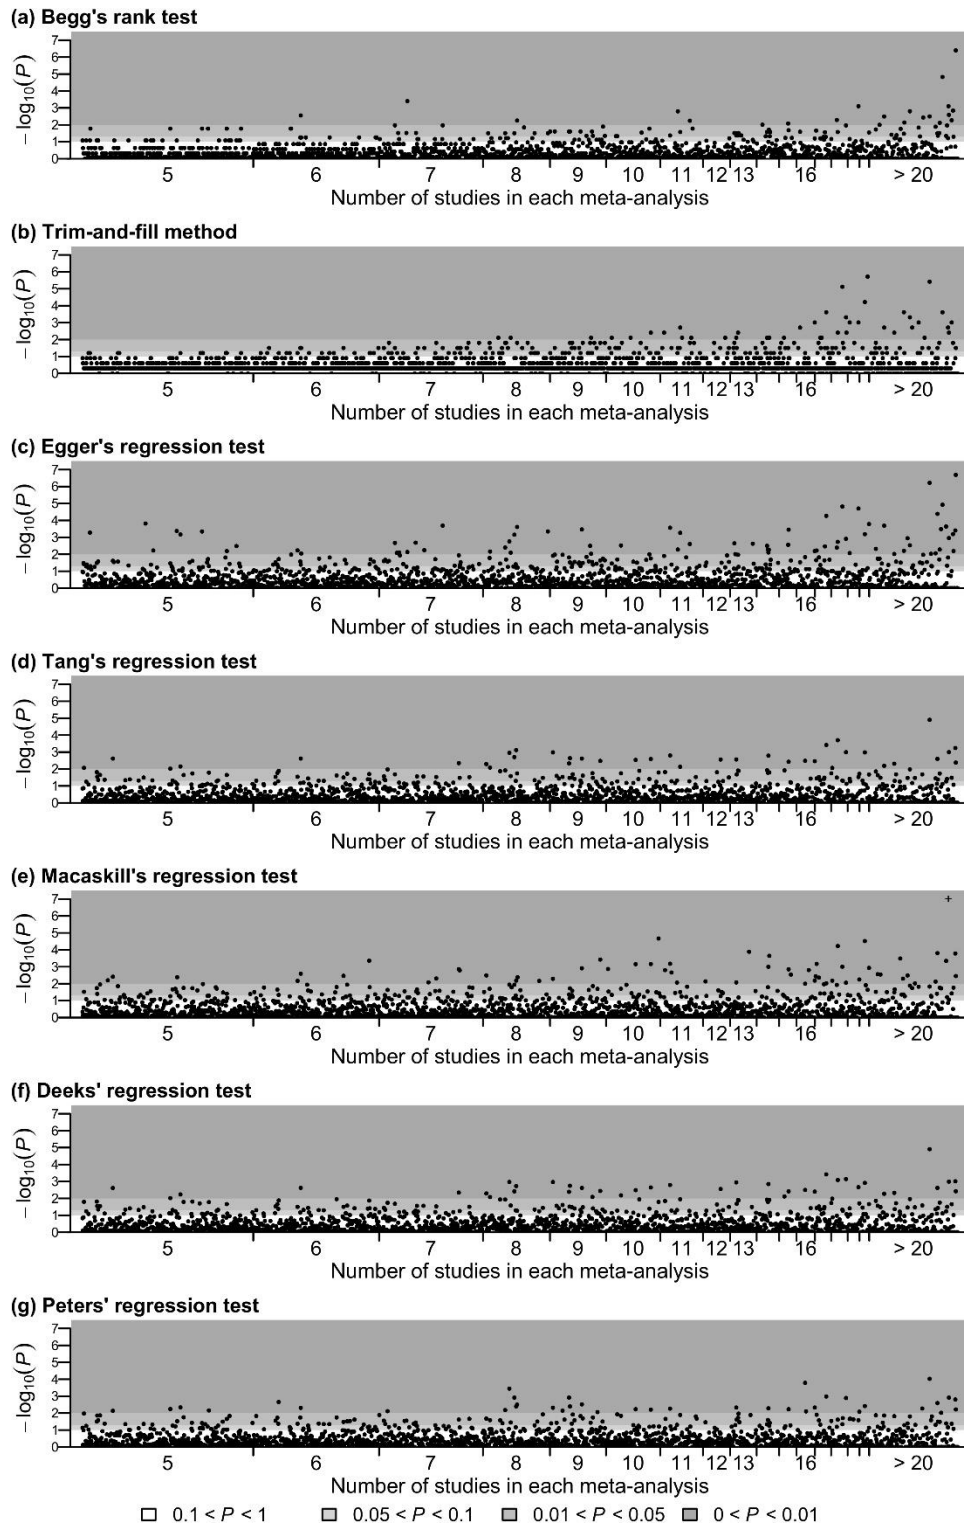

**Figure S2.** The  $P$ -values produced by seven publication bias tests for the 1906 meta-analyses that are the largest in their corresponding Cochrane systematic reviews with binary outcomes. Plus signs (+) indicate  $P$ -values  $< 10^{-7}$ .

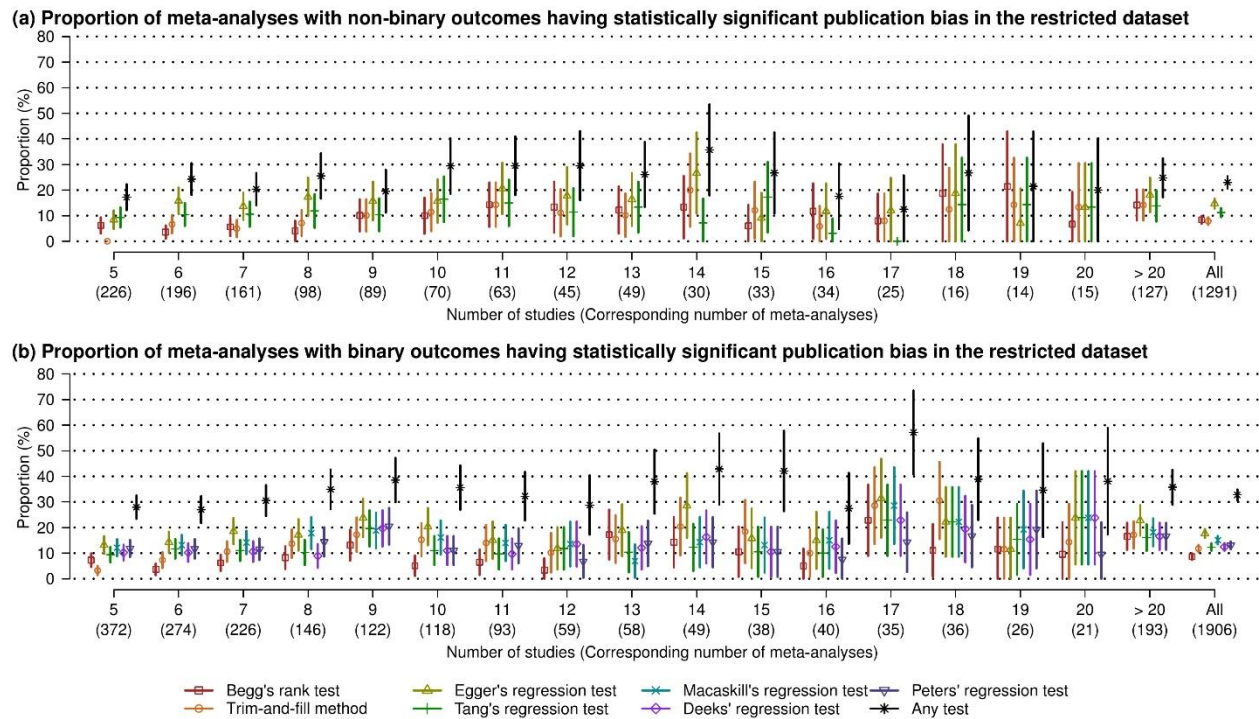

**Figure S3.** Proportions of the meta-analyses having statistically significant publication bias ( $P$ -value  $< 0.1$ ) based on various tests in the restricted dataset and their 95% confidence intervals. “Any test” implies the proportion of the meta-analyses having statistically significant publication bias detected by at least one test. The label “All” on the horizontal axis represents all the extracted meta-analyses with non-binary (upper panel) or binary (lower panel) outcomes.
